# Supplementary material
Source: PubMed Central journal article supplement (PMC6677574)

Figure S1

Figure-S1

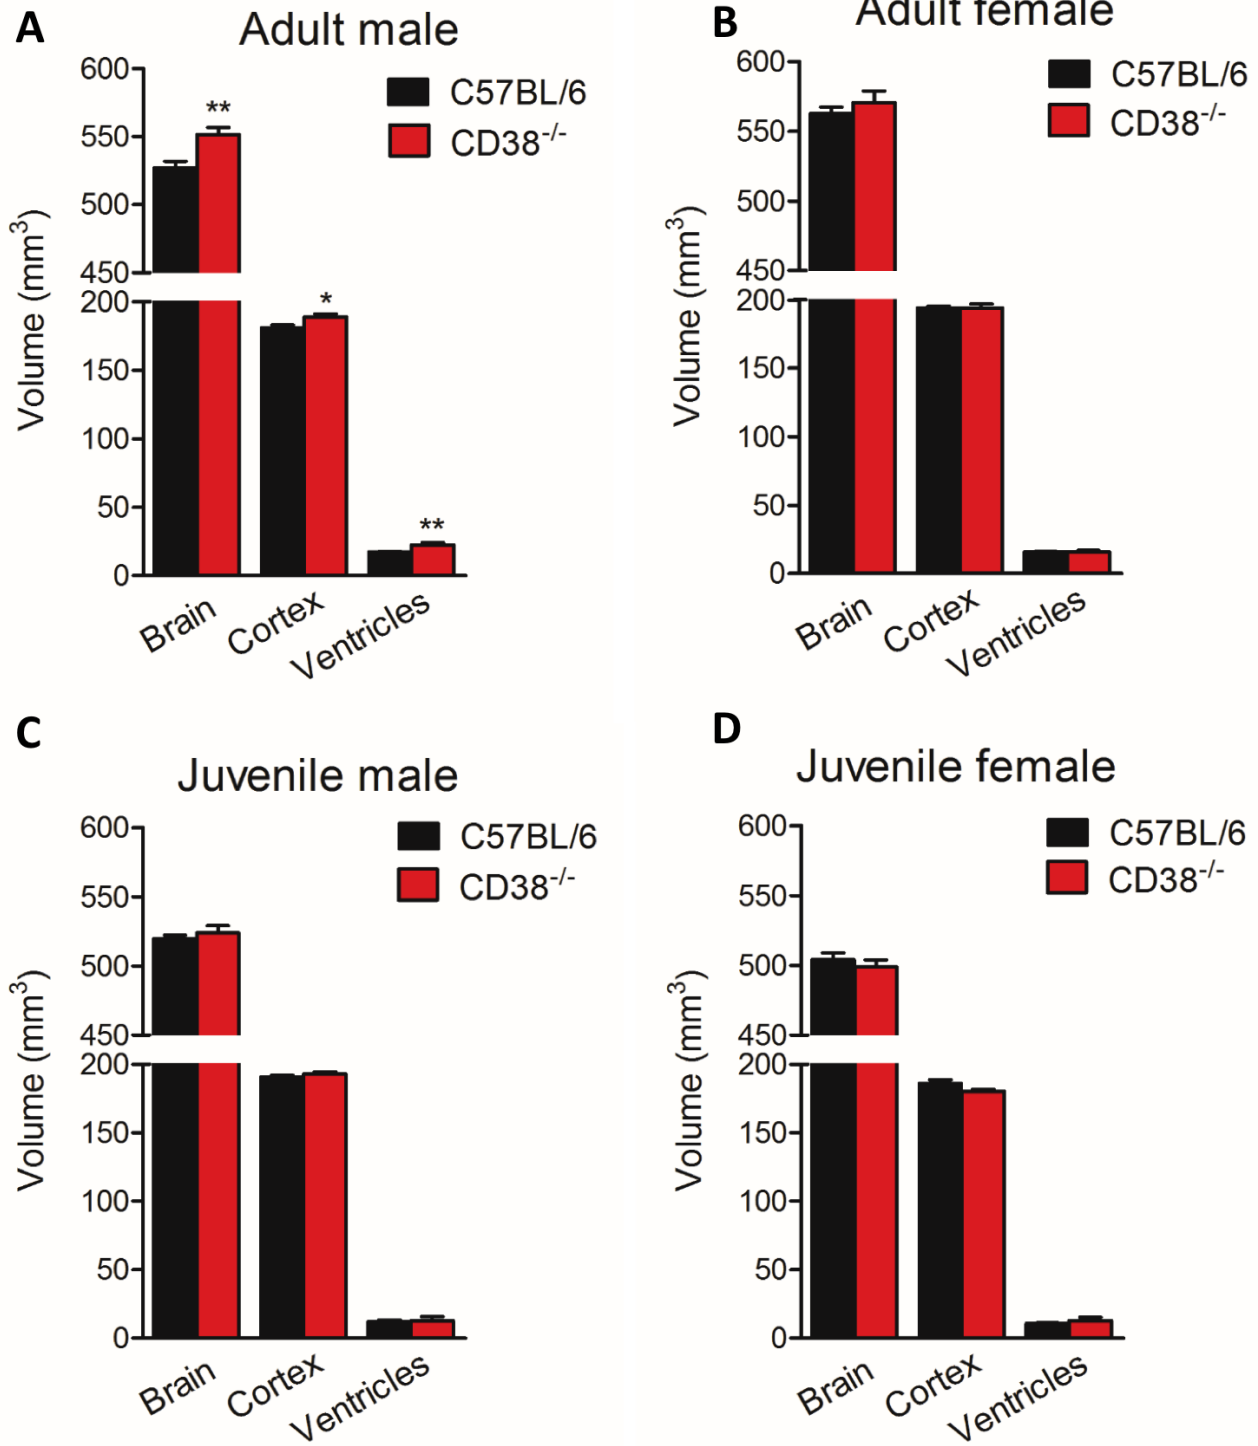

Figure S2

Figure-S2

**A** Adult male

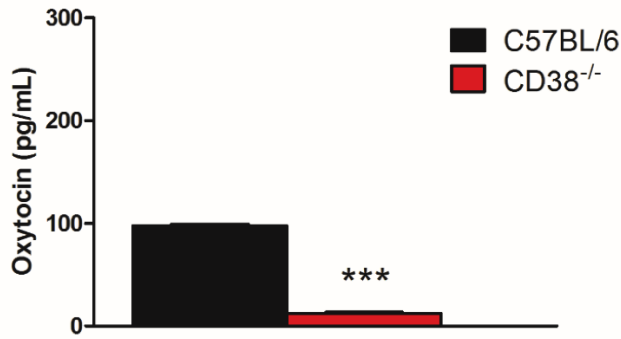

**B** Adult female

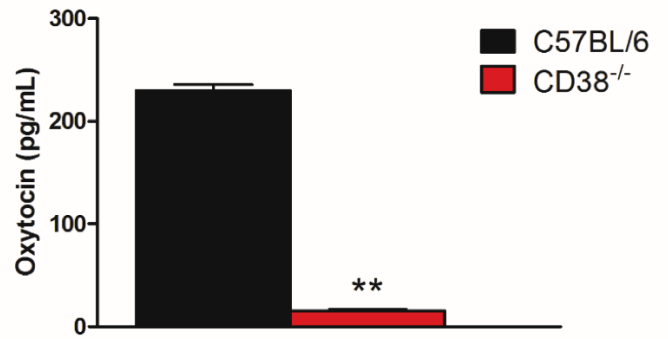

**C** Juvenile male

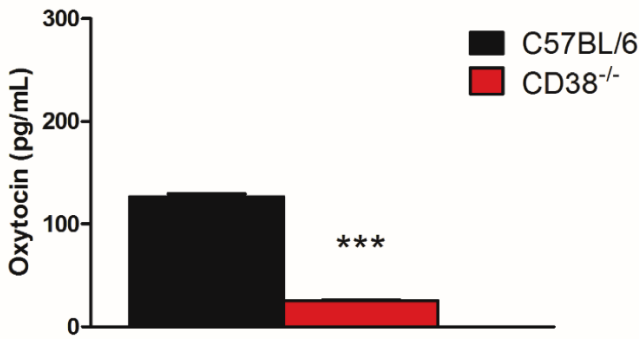

**D** Juvenile female

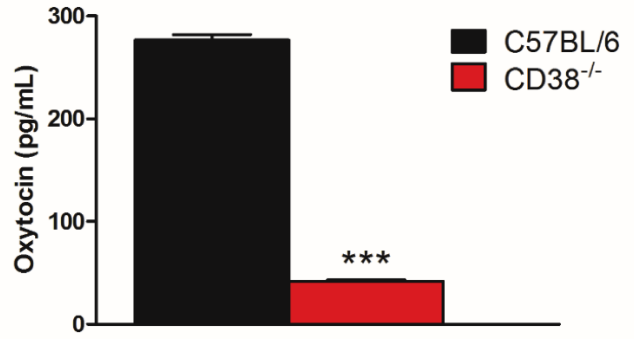

**E** CD38<sup>-/-</sup> adult male

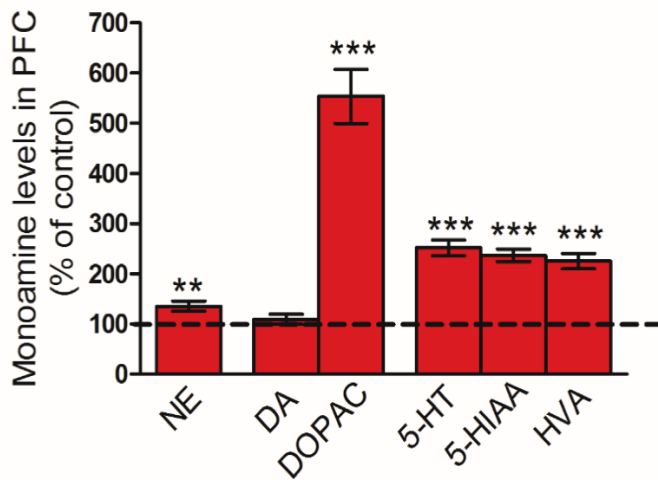

**F** CD38<sup>-/-</sup> adult female

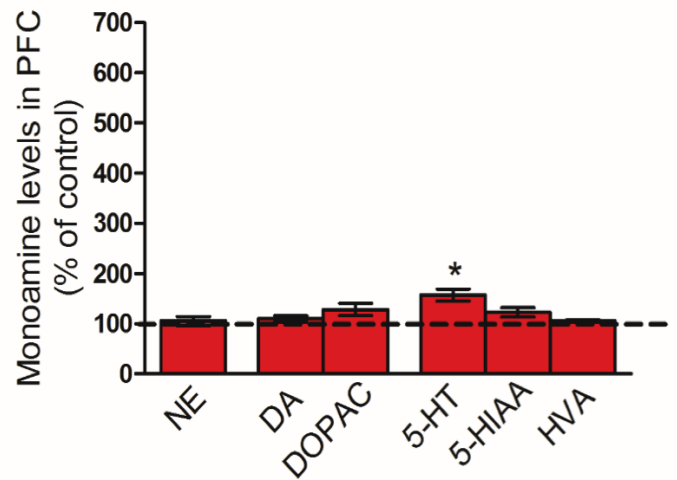

**G** CD38<sup>-/-</sup> juvenile male

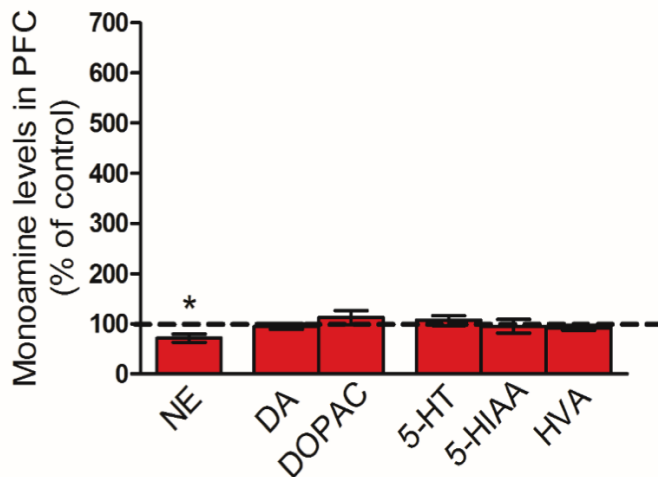

**H** CD38<sup>-/-</sup> juvenile female

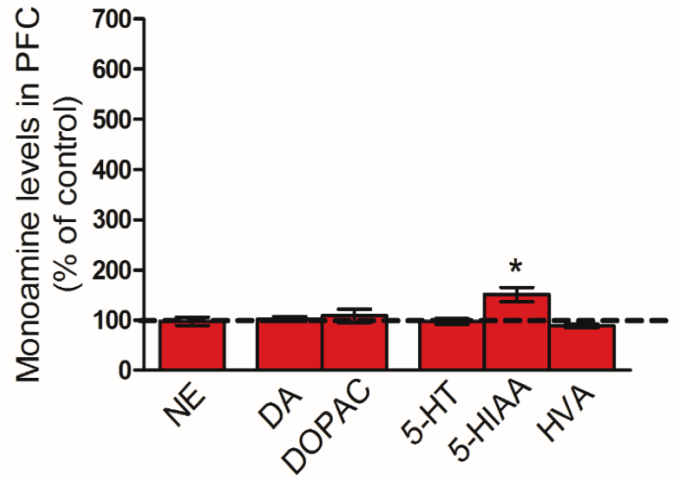

Supplement: EMS83859-supplement-Supplementary_Figures.pdf [file EMS83859-supplement-Supplementary_Figures.pdf]
